# Supplementary material
Source: publisher figshare collection journal article supplement (https://karger.figshare.com/ndownloader/files/13764176)
Supplement: Supplementary file 1 [file 13764176]

## **Supplementary Material**

# **MicroRNA-128 Protects Dopamine Neurons from Apoptosis and Upregulates the Expression of Excitatory Amino Acid Transporter 4 in Parkinson's Disease by Binding to AXIN1**

Lei Zhou<sup>b</sup> Li Yang<sup>c</sup> Yu-jin Li<sup>d</sup> Rong Mei<sup>e</sup> Hua-lin Yu<sup>a</sup> Yi Gong<sup>a</sup>  
Ming-yue Du<sup>a</sup> Fei Wang<sup>a</sup>

<sup>a</sup>Department of Neurosurgery, The First Affiliated Hospital of Kunming Medical University, Kunming, <sup>b</sup>The Key Laboratory of Stem Cell and Regenerative Medicine of Yunnan Province, Institute of Molecular and Clinical Medicine, Medical University, Kunming, <sup>c</sup>Department of Anatomy, Histology and Embryology, Kunming Medical University, Kunming, <sup>d</sup>Department of Anesthesiology, The First People's Hospital of Yunnan Province, Kunming, <sup>e</sup>Department of Neurology, The First People's Hospital of Yunnan Province, Kunming, China

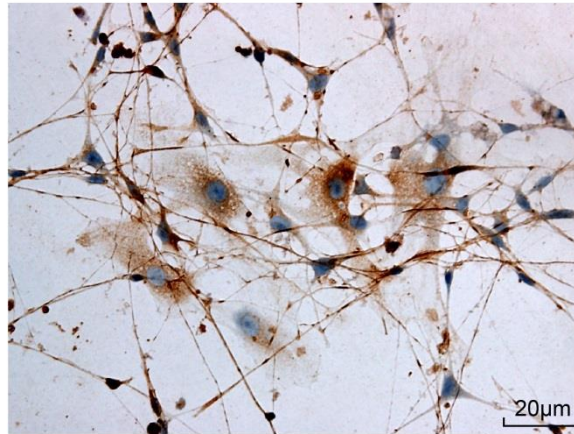

**Supplementary Figure 1** Immunocytochemical analysis ( $\times 400$ ) demonstrating the positive expression of tyrosine hydroxylase in the substantia nigra of mice, which indicates the successful extraction of dopamine neurons.
